# Supplementary material for: Hotspot Selective Preference of the Chimeric Sequences Formed in Multiple Displacement Amplification
Source: MDPI journal article supplement (doi:10.3390/ijms18030492), 2017-02-24
Supplement: s1 [file s1]

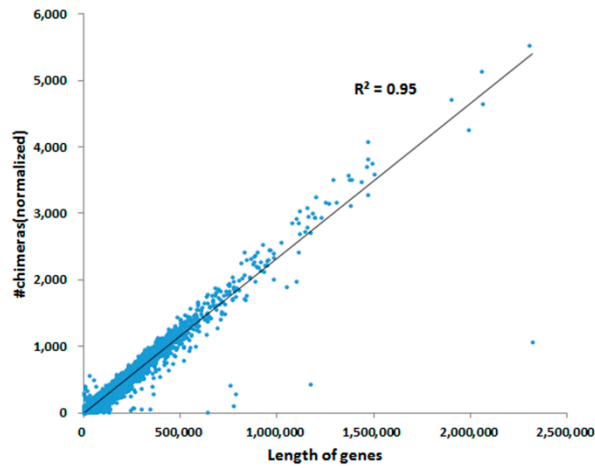

**Figure S1.** Scattergraph of normalized chimera numbers and gene lengths. The chimera numbers were normalized based on the sequencing depth of genes, to 30-fold of all genes. The genes which gotten at least five chimeras were drawn on this scattergraph.

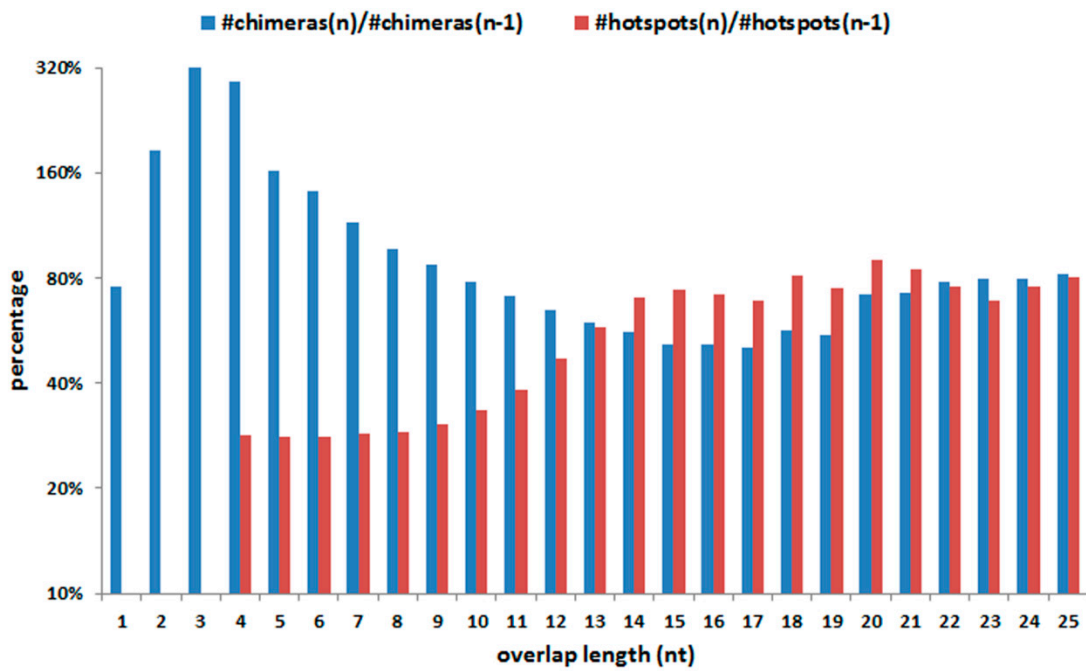

**Figure S2.** Ratio of the chimera or chimeric hotspots amounts between a given length overlap and 1 nt shorter overlap.

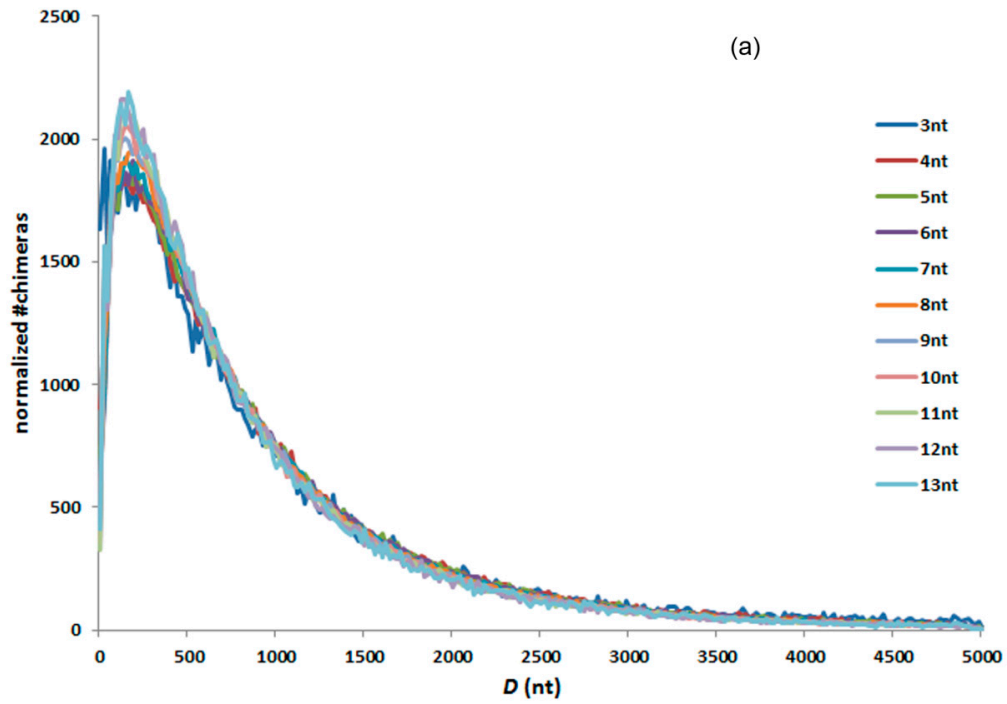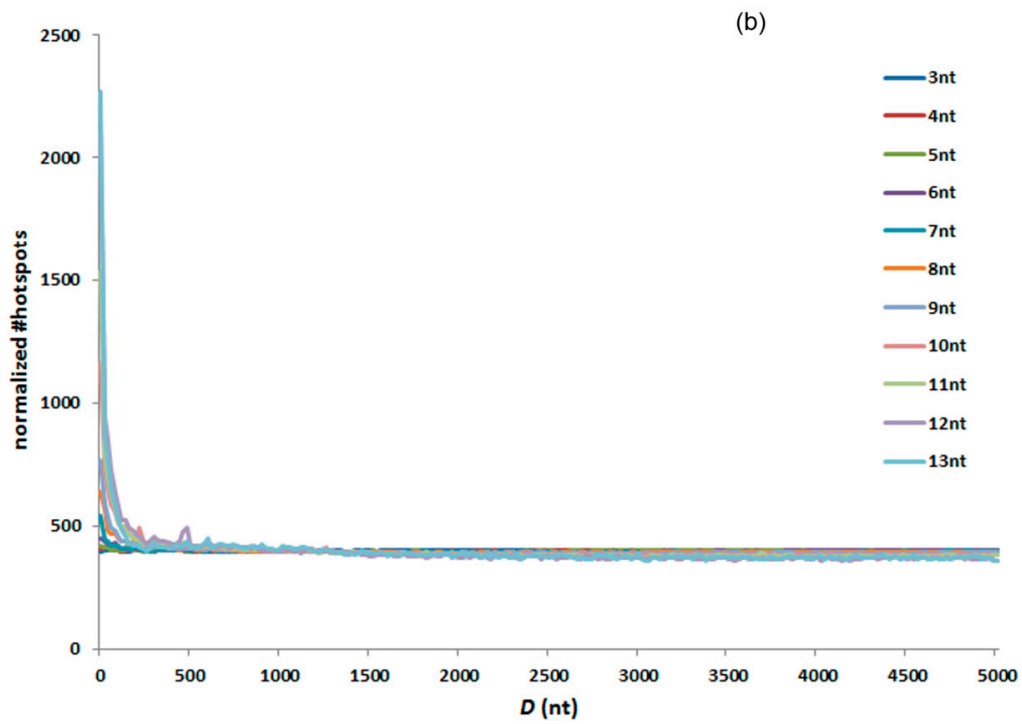

**Figure S3.** Distance distribution in different overlap lengths. (a) Distance distribution of chimeras in different overlap lengths. (b) Distance distribution of chimeric hotspots in different overlap lengths.
